# Supplementary material for: Assessment of Spontaneous Retinal Arterial Pulsations in Acute Central Retinal Vein Occlusions
Source: J Ophthalmol. 2020 Jun 9;2020:3107472. doi: 10.1155/2020/3107472 (PMC7568157; doi:10.1155/2020/3107472)
Supplement: Supplementary Materials — Video 1.mp4 (10 seconds, 4.11 MB): central retinal vein occlusion with spontaneous retinal arterial pulsations. Video 2.mp4 (10 seconds, 3.53 MB): central retinal vein occlusion without spontaneous retinal arterial pulsations. [file 3107472.f1.zip]

Archive with 2 entries (2 files):
- 3107472.f1/Video 1.mp4
- 3107472.f1/Video 2.mp4
